# Supplementary material
Source: publisher site journal article supplement (https://www.dovepress.com/article/253372)
Supplement: Supplementary file 1 [file get_supplementary_file.php]

**Appendix**

AHP questionnaire for prioritizing the factors (Criteria)

| Factor | 9 | 8 | 7 | 6 | 5 | 4 | 3 | 2 | 1 | 2 | 3 | 4 | 5 | 6 | 7 | 8 | 9 | Factor |
| --- | --- | --- | --- | --- | --- | --- | --- | --- | --- | --- | --- | --- | --- | --- | --- | --- | --- | --- |
| Financial Incentives |  |  |  |  |  |  |  |  |  |  |  |  |  |  |  |  |  | Socioeconomic Status |
| Financial Incentives |  |  |  |  |  |  |  |  |  |  |  |  |  |  |  |  |  | Demographic |
| Financial Incentives |  |  |  |  |  |  |  |  |  |  |  |  |  |  |  |  |  | Donation Perception |

AHP questionnaire for prioritizing sub factors (sub-Criteria)

| Factor | 9 | 8 | 7 | 6 | 5 | 4 | 3 | 2 | 1 | 2 | 3 | 4 | 5 | 6 | 7 | 8 | 9 | Factor |
| --- | --- | --- | --- | --- | --- | --- | --- | --- | --- | --- | --- | --- | --- | --- | --- | --- | --- | --- |
| Cash |  |  |  |  |  |  |  |  |  |  |  |  |  |  |  |  |  | Financial support |
| Cash |  |  |  |  |  |  |  |  |  |  |  |  |  |  |  |  |  | Family support |
| Income |  |  |  |  |  |  |  |  |  |  |  |  |  |  |  |  |  | Occupation |
| Income |  |  |  |  |  |  |  |  |  |  |  |  |  |  |  |  |  | Education |
| Ethnicity |  |  |  |  |  |  |  |  |  |  |  |  |  |  |  |  |  | Religion |
| Ethnicity |  |  |  |  |  |  |  |  |  |  |  |  |  |  |  |  |  | Age |
| Awareness |  |  |  |  |  |  |  |  |  |  |  |  |  |  |  |  |  | Trust |
| Awareness |  |  |  |  |  |  |  |  |  |  |  |  |  |  |  |  |  | Attitude |
